# Supplementary material for: Preparation and properties of bio-based polycarbonate/clay nanocomposites
Source: Royal Society of Chemistry journal article supplement (doi:10.1039/c1jm10087d), 2011-01-01
Supplement: c1jm10087d.pdf [file c1jm10087d.pdf]

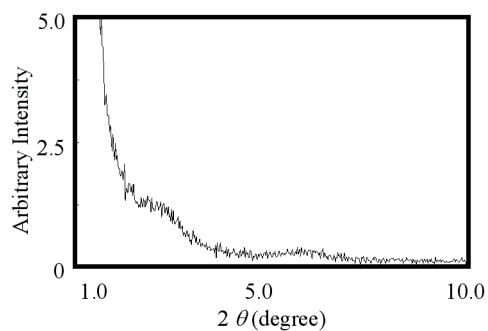

Figure S1. XRD patterns for ISPC 80/ Cloisite 30B (5.0 wt%) nanocomposite.

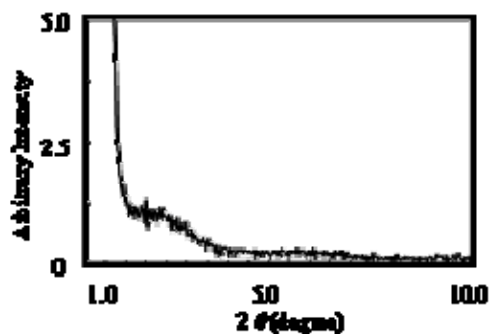

Figure S2. XRD patterns for ISPC 90/ Cloisite 30B (5.0 wt%) nanocomposite.

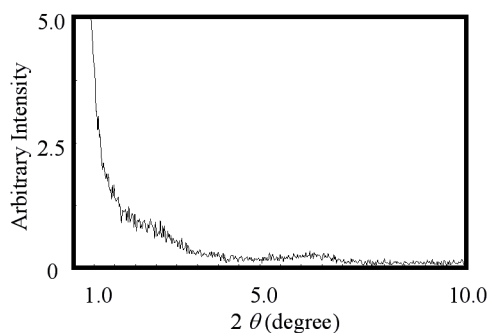

Figure S3. XRD patterns for ISPC 98/ Cloisite 30B (5.0 wt%) nanocomposite.

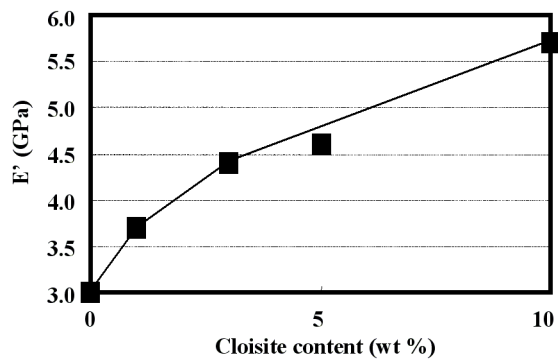

Figure S4. The variation of the storage modulus ( $E'$ ) of the ISPC 80/Cloisite 30B nanocomposite at various concentrations of Cloisite 30B.

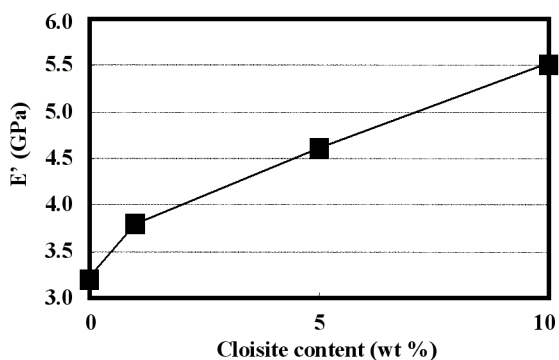

Figure S5. The variation of the storage modulus ( $E'$ ) of the ISPC 90/Cloisite 30B nanocomposite at various concentrations of Cloisite 30B.

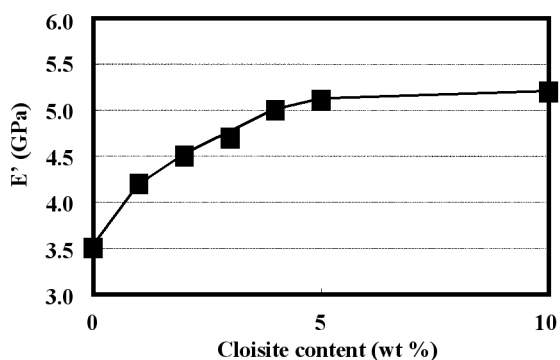

Figure S6. The variation of the storage modulus ( $E'$ ) of the ISPC 98/Cloisite 30B nanocomposite at various concentrations of Cloisite 30B.

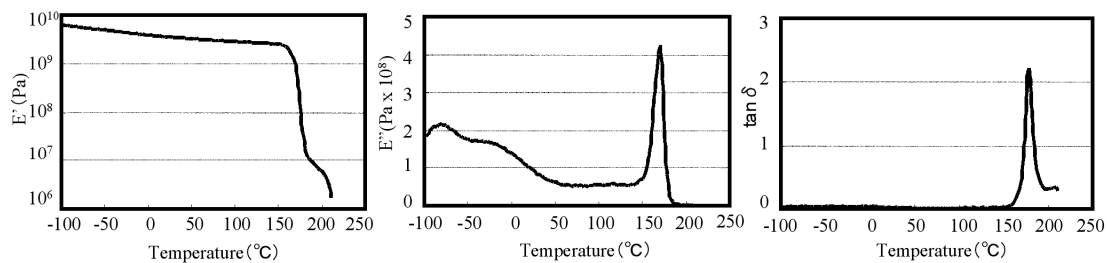

Figure S7. Temperature dependence of  $E'$ ,  $E''$ , and  $\tan \delta$  for the neat ISPC 95.

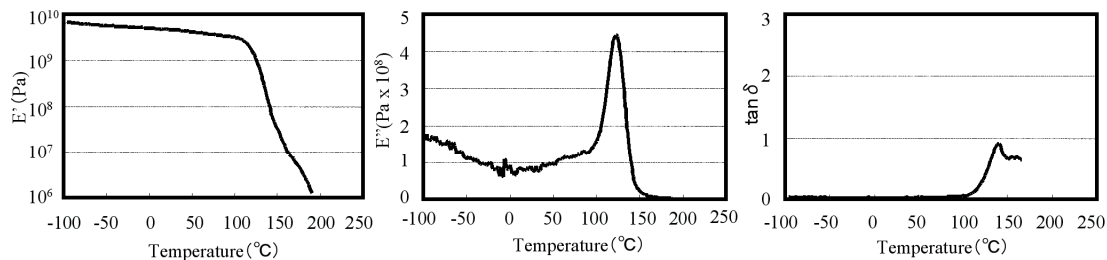

Figure S8. Temperature dependence of  $E'$ ,  $E''$ , and  $\tan \delta$  for the ISPC 80/Cloisite 30B (5.0 wt%) nanocomposite.

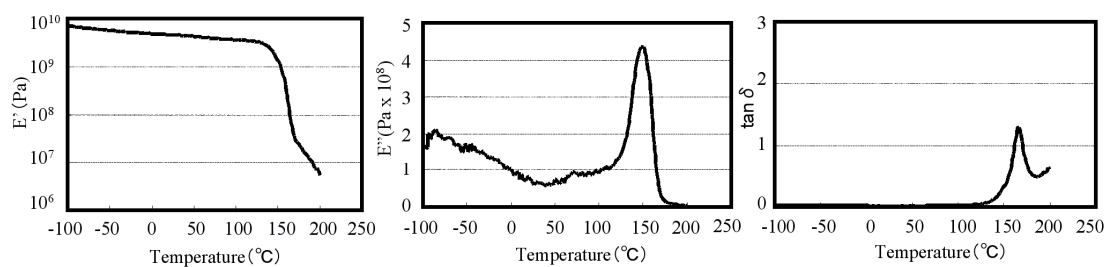

Figure S9. Temperature dependence of  $E'$ ,  $E''$ , and  $\tan \delta$  for the ISPC 90/Cloisite 30B (5.0 wt%) nanocomposite.

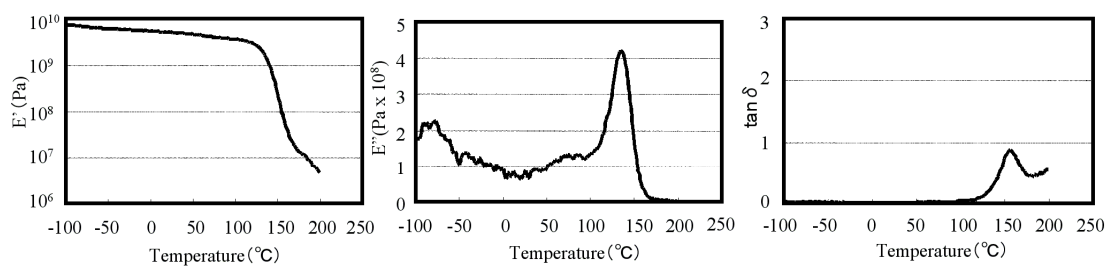

Figure S10. Temperature dependence of  $E'$ ,  $E''$ , and  $\tan \delta$  for the ISPC 98/Cloisite 30B (5.0 wt%) nanocomposite.
